# Supplementary material for: Real-time in vivo imaging of p16Ink4a gene expression: a new approach to study senescence stress signaling in living animals
Source: Springer Nature journal article supplement (doi:10.1186/1747-1028-5-1), 2010-01-01
Supplement: 13008_2009_96_MOESM2_ESM.pdf [file 13008_2009_96_MOESM2_ESM.pdf]

1.5 month

12 month

22 month

24 month

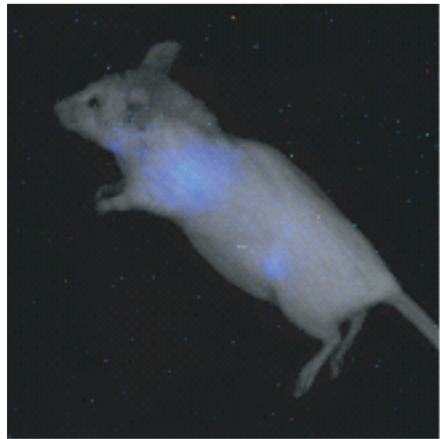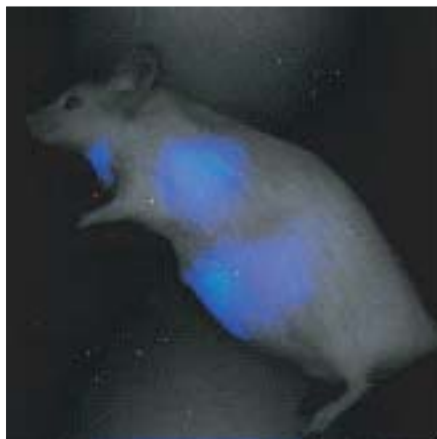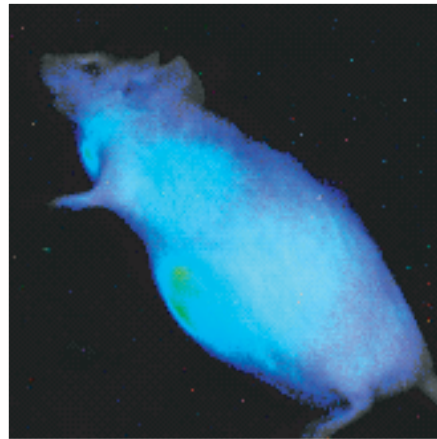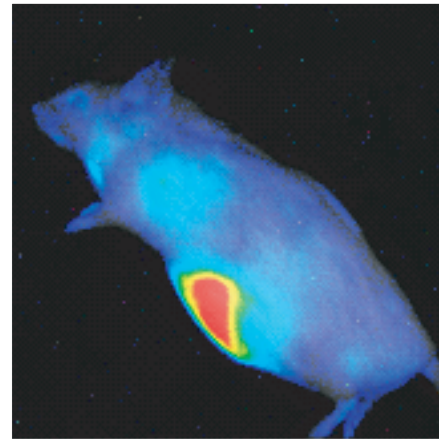

$2.0 \times 10^4$    $1.0 \times 10^5$   
(photons/second)
