# Supplementary material for: Real-time in vivo imaging of p16Ink4a gene expression: a new approach to study senescence stress signaling in living animals
Source: Springer Nature journal article supplement (doi:10.1186/1747-1028-5-1), 2010-01-01

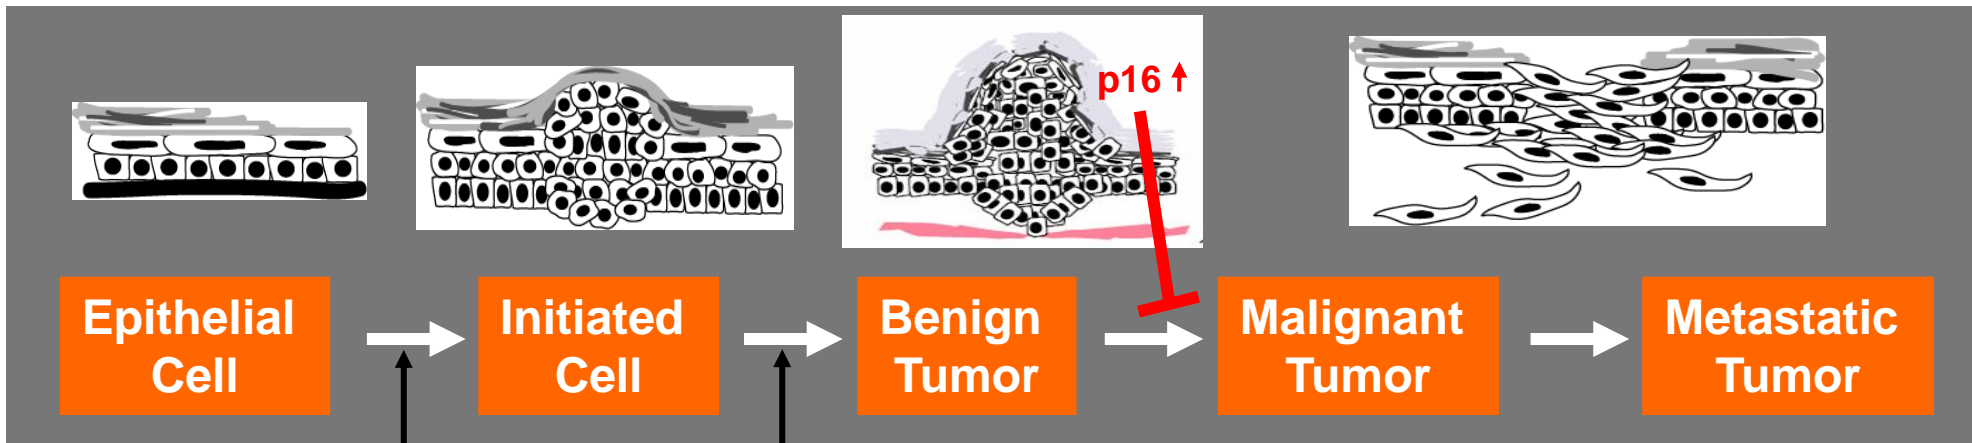

DMBA **Initiation** TPA **Promotion**

*H-ras*  
codon 61 : CAA

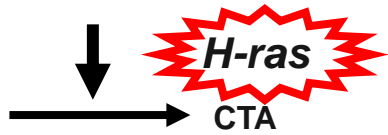

Normal skin

Early stage papilloma

Late stage papilloma

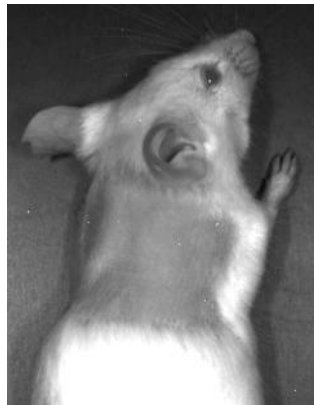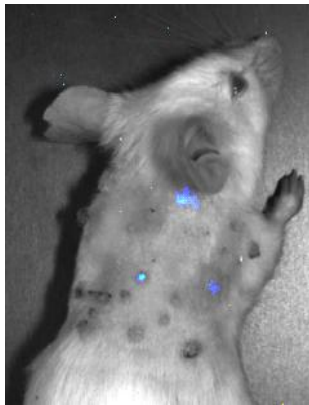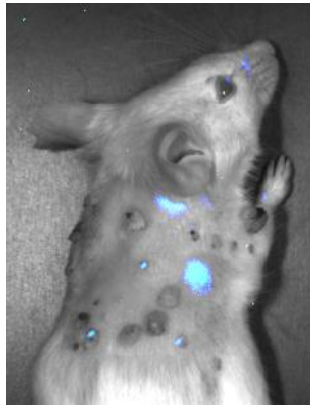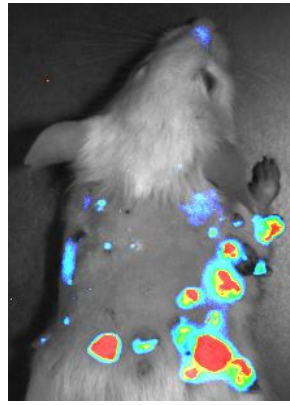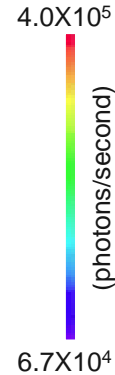

Supplement: 13008_2009_96_MOESM3_ESM.pdf [file 13008_2009_96_MOESM3_ESM.pdf]
