# Supplementary material for: Real-time in vivo imaging of p16Ink4a gene expression: a new approach to study senescence stress signaling in living animals
Source: Springer Nature journal article supplement (doi:10.1186/1747-1028-5-1), 2010-01-01

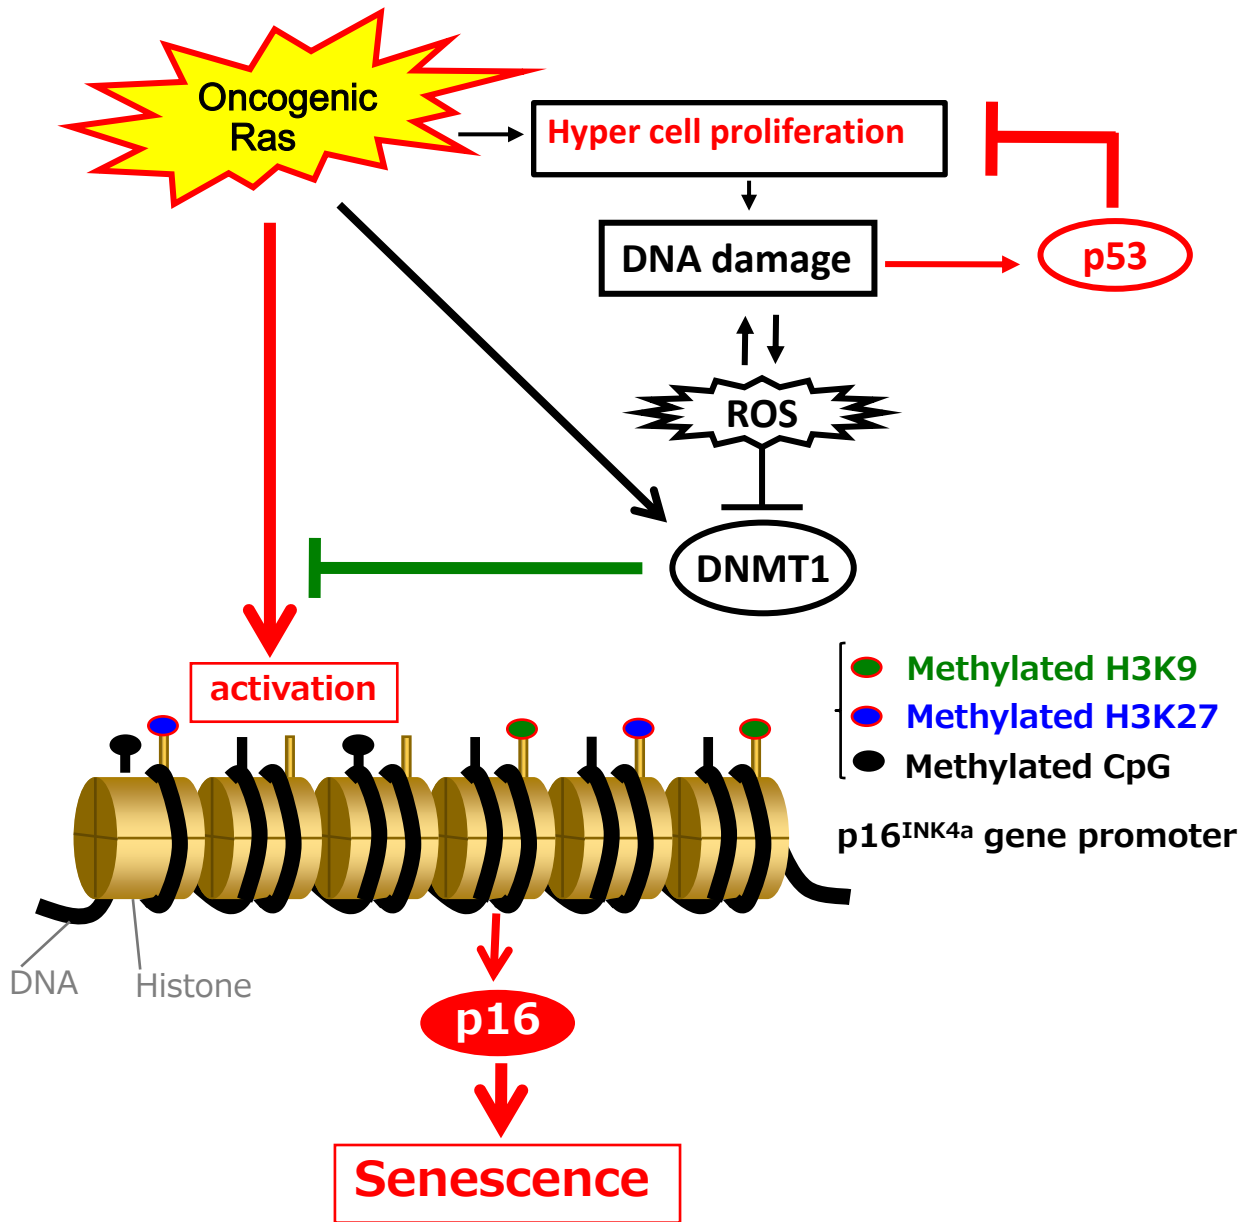

Supplement: 13008_2009_96_MOESM4_ESM.pdf [file 13008_2009_96_MOESM4_ESM.pdf]
